# Supplementary material for: Integration opportunities for HIV and family planning services in Addis Ababa, Ethiopia: an organizational network analysis
Source: PubMed Central journal article supplement (PMC3923232; doi:10.1186/1472-6963-14-22), 2014-01-18
Supplement: 1472-6963-14-22-S1.pdf [file 1472-6963-14-22-S1.pdf]

Results for eight exponential random graph models (M<sub>1</sub>-M<sub>8</sub>) of networks of HIV and family planning organizations in two sub-cities of Addis Ababa, Ethiopia in May 2011.

|                                                                     | Kirkos                 |                | Kolfe Keranyo          |              |
|---------------------------------------------------------------------|------------------------|----------------|------------------------|--------------|
|                                                                     | MLE (s.e.)             | Z-score        | MLE (s.e.)             | Z-score      |
| M <sub>1</sub> : Uniform homophily, based on organization type      | <b>0.521 (0.213) *</b> | <b>-11.963</b> | 0.416 (0.219)          | 1.902        |
| M <sub>2</sub> : Differential homophily, based on organization type |                        |                |                        |              |
| <i>FBO</i>                                                          | <b>0.847 (0.423) *</b> | <b>2.002</b>   | n/a                    | n/a          |
| <i>Government HC</i>                                                | 0.084                  | 0.076          | 16.989 (629.897)       | 0.027        |
| <i>Government Hospital</i>                                          | --                     | --             | n/a                    | n/a          |
| <i>Government HP</i>                                                | --                     | --             | -0.304 (1.101)         | -0.276       |
| <i>NGO</i>                                                          | <b>0.490 (0.226) *</b> | <b>2.169</b>   | 0.116 (0.445)          | 0.261        |
| <i>Other</i>                                                        | --                     | --             | 16.208 (738.503)       | 0.022        |
| <i>Private Clinic</i>                                               | n/a                    | n/a            | 0.237 (0.265)          | 0.895        |
| M <sub>3</sub> : Assortative mixing, based on organization type     |                        |                |                        |              |
| <i>FBO → FBO</i>                                                    | 1.273 (0.729)          | 1.745          | n/a                    | n/a          |
| <i>Government HC → FBO</i>                                          | 0.041 (0.967)          | 0.042          | n/a                    | n/a          |
| <i>Government Hospital → FBO</i>                                    | --                     | --             | 17.635 (2399.545)      | 0.007        |
| <i>Government HP → FBO</i>                                          | --                     | --             | 0.376 (1.248)          | 0.301        |
| <i>NGO → FBO</i>                                                    | 0.594 (0.674)          | 0.881          | 1.069 (0.852)          | 1.256        |
| <i>Other → FBO</i>                                                  | --                     | --             | n/a                    | n/a          |
| <i>Private Clinic → FBO</i>                                         | 1.427 (0.865)          | 1.650          | n/a                    | n/a          |
| <i>FBO Government HC</i>                                            | 1.165 (0.806)          | 1.445          | 0.376 (1.248)          | 0.301        |
| <i>Government HC → Government HC</i>                                | 0.511 (1.254)          | 0.407          | 18.752 (1712.238)      | 0.011        |
| <i>Government Hospital → Government HC</i>                          | --                     | --             | 18.229 (1863.921)      | 0.010        |
| <i>Government HP → Government HC</i>                                | --                     | --             | 0.376 (.747)           | 0.503        |
| <i>NGO → Government HC</i>                                          | 0.511 (0.738)          | 0.692          | 0.617 (0.541)          | 1.142        |
| <i>Other → Government HC</i>                                        | --                     | --             | -0.540 (1.122)         | -0.482       |
| <b><i>Private Clinic → Government HC</i></b>                        | n/a                    | n/a            | <b>0.936 (0.439) *</b> | <b>2.134</b> |
| <i>FBO → Government Hospital</i>                                    | --                     | --             | 17.635 (2399.545)      | 0.007        |
| <i>Government HC → Government Hospital</i>                          | --                     | --             | 18.229 (1863.921)      | 0.010        |
| <i>Government Hospital → Government Hospital</i>                    | --                     | --             | n/a                    | n/a          |
| <i>Government HP → Government Hospital</i>                          | --                     | --             | 1.762 (1.248)          | 1.412        |
| <b><i>NGO → Government Hospital</i></b>                             | --                     | --             | <b>2.679 (1.122) *</b> | <b>2.388</b> |
| <i>Other → Government Hospital</i>                                  | --                     | --             | 17.972 (2007.458)      | 0.009        |
| <i>Private Clinic Government Hospital</i>                           | --                     | --             | 19.188 (1648.956)      | 0.012        |
| <i>FBO → Government HP</i>                                          | --                     | --             | 0.376 (1.248)          | 0.301        |
| <i>Government HC → Government HP</i>                                | --                     | --             | 1.292 (0.713)          | 1.812        |

|                                                                           |                                             |        |                                                   |               |
|---------------------------------------------------------------------------|---------------------------------------------|--------|---------------------------------------------------|---------------|
| Government Hospital → Government HP                                       | --                                          | --     | 0.376 (1.248)                                     | 0.301         |
| Government HP → Government HP                                             | --                                          | --     | -0.540 (1.122)                                    | -0.482        |
| NGO → Government HP                                                       | --                                          | --     | -0.540 (0.677)                                    | -0.798        |
| Other → Government HP                                                     | --                                          | --     | n/a                                               | n/a           |
| <b>Private Clinic → Government HP</b>                                     | --                                          | --     | <b>-2.298 (1.045) *</b>                           | <b>-2.198</b> |
| FBO → NGO                                                                 | 0.423 (0.681)                               | 0.620  | -0.540 (1.122)                                    | -0.482        |
| Government HC → NGO                                                       | 0.119 (0.775)                               | 0.153  | -1.010 (0.788)                                    | -1.282        |
| Government Hospital → NGO                                                 | --                                          | --     | 0.376 (0.899)                                     | 0.418         |
| Government HP → NGO                                                       | --                                          | --     | -0.540 (0.677)                                    | -0.798        |
| NGO → NGO                                                                 | 0.916 (0.636)                               | 1.441  | -0.120 (0.495)                                    | -0.243        |
| Other → NGO                                                               | --                                          | --     | n/a                                               | n/a           |
| <b>Private Clinic → NGO</b>                                               | 0.000 (0.864)                               | 0.000  | <b>-2.298 (0.759) **</b>                          | <b>-3.029</b> |
| FBO → Other                                                               | --                                          | --     | n/a                                               | n/a           |
| Government HC → Other                                                     | --                                          | --     | -0.540 (1.122)                                    | -0.482        |
| Government Hospital → Other                                               | --                                          | --     | 1.069 (1.435)                                     | 0.745         |
| Government HP → Other                                                     | --                                          | --     | n/a                                               | n/a           |
| NGO → Other                                                               | --                                          | --     | -1.329 (1.072)                                    | -1.239        |
| Other → Other                                                             | --                                          | --     | 17.972 (2007.458)                                 | 0.009         |
| <b>Private Clinic → Other</b>                                             | --                                          | --     | <b>1.475 (0.516) **</b>                           | <b>2.855</b>  |
| FBO → Private Clinic                                                      | -0.278 (1.210)                              | -0.229 | n/a                                               | n/a           |
| <b>Government HC → Private Clinic</b>                                     | 0.511 (1.254)                               | 0.407  | <b>-1.570 (0.771) *</b>                           | <b>-2.037</b> |
| Government Hospital → Private Clinic                                      | --                                          | --     | 0.222 (0.731)                                     | 0.303         |
| Government HP → Private Clinic                                            | --                                          | --     | -1.128 (0.655)                                    | -1.723        |
| <b>NGO → Private Clinic</b>                                               | n/a                                         | n/a    | <b>-1.570 (0.571) **</b>                          | <b>-2.748</b> |
| Other → Private Clinic                                                    | --                                          | --     | -0.029 (0.570)                                    | -0.052        |
| Private Clinic → Private Clinic                                           | n/a                                         | n/a    | n/a                                               | n/a           |
| M <sub>4</sub> : Assortative mixing, based on HIV/FP service provision    |                                             |        |                                                   |               |
| Both → Both                                                               | -0.156 (0.417)                              | -0.374 | -0.466 (0.469)                                    | -0.963        |
| FP → Both                                                                 | --                                          | --     | -0.228 (0.483)                                    | -0.337        |
| HIV → Both                                                                | -0.437 (0.285)                              | -1.534 | -0.647 (0.677)                                    | -1.226        |
| <i>Both</i> → <i>FP</i>                                                   | --                                          | --     | <b>-2.325 (1.128) *</b>                           | <b>-2.062</b> |
| FP → FP                                                                   | --                                          | --     | n/a                                               | n/a           |
| HIV → FP                                                                  | --                                          | --     | -0.767 (1.212)                                    | -0.633        |
| <i>Both</i> → <i>HIV</i>                                                  | -0.501 (0.290)                              | -1.726 | <b>-1.116 (0.546) *</b>                           | <b>-2.043</b> |
| FP → HIV                                                                  | --                                          | --     | -0.767 (1.212)                                    | -0.633        |
| HIV → HIV                                                                 | n/a                                         | n/a    | n/a                                               | n/a           |
| M <sub>5</sub> : Node covariance, based on client-to-staff ratio          | 1.277 <sup>-4</sup> (7.406 <sup>-5</sup> )  | 0.172  | <b>-8.686<sup>-5</sup> (3.542<sup>-5</sup>) *</b> | <b>-2.452</b> |
| M <sub>6</sub> : Node covariance, based on client-to-clinical staff ratio | -1.659 <sup>-4</sup> (7.180 <sup>-5</sup> ) | -0.231 | <b>-4.740<sup>-5</sup> (2.009<sup>-5</sup>) *</b> | <b>-2.359</b> |

|                                                                               |                                             |        |                                                   |               |
|-------------------------------------------------------------------------------|---------------------------------------------|--------|---------------------------------------------------|---------------|
| M <sub>7</sub> : Node covariance, based on client-to-non-clinical staff ratio | -9.580 <sup>-5</sup> (1.063 <sup>-5</sup> ) | -0.901 | <b>-2.472<sup>-5</sup> (1.035<sup>-5</sup>) *</b> | <b>-2.388</b> |
| M <sub>8</sub> : Edge covariance, based on driving distance                   | 5.500 <sup>-5</sup> (3.790 <sup>-5</sup> )  | 1.452  | -1.650 <sup>-5</sup> (2.520 <sup>-5</sup> )       | -0.656        |

---

Statistical significance codes: '\*\*\*' ≤ 0.001; '\*\*' ≤ 0.01; '\*' ≤ 0.05.

Condensed Summary of ERGM Analysis Results for Network Models (M<sub>1</sub>-M<sub>8</sub>)

|                                                                                      | Kirkos                                      |         | Kolfe Keranyo                                 |         |
|--------------------------------------------------------------------------------------|---------------------------------------------|---------|-----------------------------------------------|---------|
|                                                                                      | MLE (s.e.)                                  | Z-score | MLE (s.e.)                                    | Z-score |
| M <sub>1</sub> : Uniform homophily, based on <i>organization type</i>                | 0.521 (0.213) *                             | -11.963 | 0.416 (0.219)                                 | 1.902   |
| M <sub>2</sub> : Differential homophily, based on <i>organization type</i>           |                                             |         |                                               |         |
| <i>FBO</i>                                                                           | 0.847 (0.423) *                             | 2.002   | n/a                                           | n/a     |
| <i>NGO</i>                                                                           | 0.490 (0.226) *                             | 2.169   | 0.116 (0.445)                                 | 0.261   |
| M <sub>3</sub> : Assortative mixing, based on <i>organization type</i>               |                                             |         |                                               |         |
| <i>Private Clinic</i> → <i>Government HC</i>                                         | n/a                                         | n/a     | 0.936 (0.439) *                               | 2.134   |
| <i>NGO</i> → <i>Government Hospital</i>                                              | --                                          |         | 2.679 (1.122) *                               | 2.388   |
| <i>Private Clinic</i> → <i>Government HP</i>                                         | --                                          |         | -2.298 (1.045) *                              | -2.198  |
| <i>Private Clinic</i> → <i>NGO</i>                                                   | 0.000 (0.864)                               | 0.000   | -2.298 (0.759) **                             | -3.029  |
| <i>Private Clinic</i> → <i>Other</i>                                                 | --                                          |         | 1.475 (0.516) **                              | 2.855   |
| <i>Government HC</i> → <i>Private Clinic</i>                                         | 0.511 (1.254)                               | 0.407   | -1.570 (0.771) *                              | -2.037  |
| <i>NGO</i> → <i>Private Clinic</i>                                                   | n/a                                         | n/a     | -1.570 (0.571) **                             | -2.748  |
| M <sub>4</sub> : Assortative mixing, based on <i>HIV/FP service provision</i>        |                                             |         |                                               |         |
| <i>Both</i> → <i>FP</i>                                                              | --                                          | --      | -2.325 (1.128) *                              | -2.062  |
| <i>Both</i> → <i>HIV</i>                                                             | -0.501 (0.290)                              | -1.726  | -1.116 (0.546) *                              | -2.043  |
| M <sub>5</sub> : Node covariance, based on <i>client-to-staff ratio</i>              | 1.277 <sup>-4</sup> (7.406 <sup>-5</sup> )  | 0.172   | -8.686 <sup>-5</sup> (3.542 <sup>-5</sup> ) * | -2.452  |
| M <sub>6</sub> : Node covariance, based on <i>client-to-clinical staff ratio</i>     | -1.659 <sup>-4</sup> (7.180 <sup>-5</sup> ) | -0.231  | -4.740 <sup>-5</sup> (2.009 <sup>-5</sup> ) * | -2.359  |
| M <sub>7</sub> : Node covariance, based on <i>client-to-non-clinical staff ratio</i> | -9.580 <sup>-5</sup> (1.063 <sup>-5</sup> ) | -0.901  | -2.472 <sup>-5</sup> (1.035 <sup>-5</sup> ) * | -2.388  |
| M <sub>8</sub> : Edge covariance, based on <i>driving distance</i>                   | 5.500 <sup>-5</sup> (3.790 <sup>-5</sup> )  | 1.452   | -1.650 <sup>-5</sup> (2.520 <sup>-5</sup> )   | -0.656  |

Non-significant results were excluded from this table.

Signif. codes: 0 '\*\*\*\*' 0.001 '\*\*' 0.01 '\*' 0.05 '.'

"n/a" represents those measure
