# Supplementary material for: Integration opportunities for HIV and family planning services in Addis Ababa, Ethiopia: an organizational network analysis
Source: BMC Health Serv Res. 2014 Jan 18;14:22. doi: 10.1186/1472-6963-14-22 (PMC3923232; doi:10.1186/1472-6963-14-22)
Supplement: Additional file 2 — Kirkos Kolfe opportunities. [file 1472-6963-14-22-S2.pdf]

Opportunities and Options for the Integration of HIV and Family Planning Services  
Review of Client Referrals and Services among Organizations

Kirkos

No. of HIV Services Provided  
Offer Family Planning Services

|     |    | 6  | 13 | 7  | 4  | 14  | 3   | 6  | 8  | 13  | 15  | 10 | 7  | 6   | 8  | 8  | 6  | 6  | 7  | 5  | 4   | 2  | 12  | 6  | 6  | 9  |
|-----|----|----|----|----|----|-----|-----|----|----|-----|-----|----|----|-----|----|----|----|----|----|----|-----|----|-----|----|----|----|
|     |    | No | No | No | No | Yes | Yes | No | No | Yes | Yes | No | No | Yes | No | No | No | No | No | No | Yes | No | Yes | No | No | No |
| ID  |    | 1  | 2  | 3  | 4  | 5   | 6   | 7  | 8  | 9   | 10  | 11 | 12 | 13  | 14 | 15 | 16 | 17 | 18 | 19 | 20  | 21 | 22  | 23 | 24 | 25 |
| No  | 1  | -  |    | ●  |    | ○   | ○   |    |    | ○   | ○   |    |    | ○   |    | ●  |    |    |    |    | ○   |    | ○   |    |    |    |
| No  | 2  |    | -  | ●  |    | ○   | ●   |    |    | ○   | ○   |    | ●  | ○   | ●  |    | ●  |    |    |    | ○   | ●  | ○   |    |    | ●  |
| No  | 3  | ●  | ●  | -  | ●  | ●   | ○   |    |    | ○   | ●   |    |    | ○   | ●  | ●  | ●  |    |    |    | ○   | ●  | ○   |    |    |    |
| No  | 4  |    | ●  | ●  | -  | ○   | ○   |    |    | ●   | ●   |    |    | ○   |    |    | ●  |    |    |    | ○   | ●  | ●   |    |    |    |
| Yes | 5  | ○  | ○  | ●  | ○  | -   | ■   | ○  | ○  | ●   | ●   | ○  | ○  | ■   | ○  | ○  | ○  | ○  | ○  | ○  | ■   | ●  | ●   | ○  | ○  | ●  |
| Yes | 6  | ○  | ○  | ○  | ○  | ●   | -   | ○  | ○  | ■   | ■   | ○  | ○  | ■   | ○  | ○  | ○  | ○  | ○  | ○  | ●   | ○  | ■   | ○  | ○  | ○  |
| No  | 7  |    |    |    |    | ○   | ○   | -  |    | ●   | ○   |    |    | ○   |    | ●  |    |    |    |    | ○   | ●  | ●   |    |    |    |
| No  | 8  |    |    |    |    | ○   | ○   |    | -  |     |     | ●  |    | ○   |    |    |    |    | ●  |    | ○   | ●  | ●   |    |    |    |
| Yes | 9  | ○  | ○  | ○  | ○  | ■   | ■   | ○  | ○  | -   | ■   | ○  | ○  | ■   | ○  | ○  | ○  | ○  | ○  | ○  | ■   | ○  | ■   | ○  | ○  | ○  |
| Yes | 10 | ○  | ○  | ○  | ○  | ●   | ■   | ○  | ○  | ●   | -   | ○  | ○  | ■   | ●  | ●  | ●  | ●  | ○  | ○  | ○   | ○  | ■   | ○  | ○  | ○  |
| No  | 11 |    |    |    |    | ○   | ○   |    | ●  | ○   | ○   | -  |    | ○   |    |    |    |    | ●  |    | ○   |    | ○   | ●  |    |    |
| No  | 12 |    |    |    |    | ●   | ○   |    |    | ○   | ○   |    | -  | ○   |    |    |    |    |    |    | ○   | ●  | ●   |    |    | ●  |
| Yes | 13 | ○  | ○  | ○  | ○  | ●   | ■   | ○  | ○  | ■   | ■   | ○  | ●  | -   | ○  | ○  | ○  | ○  | ○  | ○  | ■   | ●  | ■   | ○  | ○  | ○  |
| No  | 14 |    |    |    |    | ●   | ○   |    |    | ●   | ●   |    | ●  | ○   | -  |    | ●  |    |    |    | ●   |    | ●   |    |    | ●  |
| No  | 15 |    |    |    |    | ○   | ○   |    |    | ○   | ○   |    |    | ○   |    | -  |    |    |    |    | ○   |    | ●   |    |    |    |
| No  | 16 |    | ●  | ●  | ●  | ●   | ○   |    |    | ○   | ●   |    |    | ○   | ●  |    | -  |    |    |    | ○   | ●  | ○   |    |    |    |
| No  | 17 |    |    |    |    | ●   | ○   |    |    | ●   | ●   |    |    | ○   |    |    |    | -  |    |    | ○   |    | ○   |    |    |    |
| No  | 18 |    |    |    |    | ○   | ○   |    | ●  | ○   | ○   | ●  |    | ○   |    |    |    |    | -  |    | ○   |    | ●   | ●  |    |    |
| No  | 19 | ●  |    |    |    | ○   | ○   |    |    | ○   | ●   |    |    | ○   |    |    |    |    |    | -  | ○   | ●  | ●   |    | ●  |    |
| Yes | 20 | ○  | ●  | ○  | ○  | ■   | ■   | ●  | ○  | ●   | ●   | ○  | ●  | ■   | ●  | ○  | ○  | ○  | ○  | ○  | -   | ●  | ○   | ○  | ○  | ●  |
| No  | 21 |    | ●  |    |    | ○   | ○   |    |    | ○   | ○   |    |    | ○   | ●  | ●  | ●  |    |    |    | ○   | -  | ●   | ○  |    | ●  |
| Yes | 22 | ●  | ●  | ○  | ○  | ■   | ■   | ○  | ○  | ●   | ●   | ●  | ○  | ■   | ○  | ○  | ○  | ○  | ○  | ○  | ●   | ●  | -   | ○  | ○  | ●  |
| No  | 23 |    |    |    |    | ○   | ○   |    | ●  | ○   | ●   | ●  |    | ○   |    |    |    |    |    |    | ○   |    | ○   | -  |    |    |
| No  | 24 |    |    |    |    | ○   | ○   |    |    | ○   | ○   |    |    | ○   |    |    |    |    | ●  |    | ○   |    | ●   |    | -  |    |
| No  | 25 |    |    |    |    | ●   | ○   |    |    | ○   | ○   |    |    | ○   |    |    |    |    |    |    | ○   |    | ●   |    |    | -  |

Kolfe Keranyo

|     |    | 8  | 8  | 15  | 6   | 14  | 14  | 5  | 9   | 5   | 6   | 6   | 7  | 4   | 1   | 9   | 7   | 2   | 4   | 5   | 0  | 10  | 4   | 4   | 10 | 9   | 13  |   |
|-----|----|----|----|-----|-----|-----|-----|----|-----|-----|-----|-----|----|-----|-----|-----|-----|-----|-----|-----|----|-----|-----|-----|----|-----|-----|---|
|     |    | No | No | Yes | Yes | Yes | Yes | No | Yes | Yes | Yes | Yes | No | Yes | No | Yes | Yes | Yes | No | Yes | Yes |   |
| ID  |    | 1  | 2  | 3   | 4   | 5   | 6   | 7  | 8   | 9   | 10  | 11  | 12 | 13  | 14  | 15  | 16  | 17  | 18  | 19  | 20 | 21  | 22  | 23  | 24 | 25  | 26  |   |
| No  | 1  | -  | ●  | ○   | ○   | ○   | ●   |    | ○   | ○   | ○   | ○   |    | ○   | ○   | ○   | ○   | ○   | ○   | ○   |    | ○   | ○   | ●   |    | ○   | ●   |   |
| No  | 2  | ●  | -  | ●   | ●   | ○   | ●   |    | ○   | ○   | ○   | ○   | ●  | ●   | ○   | ○   | ○   | ○   | ○   | ○   |    | ○   | ○   | ●   |    | ○   | ●   |   |
| Yes | 3  | ○  | ○  | -   | ●   |     | ●   | ○  | ●   |     |     |     | ○  |     | ●   |     |     |     |     |     | ○  |     |     | ●   | ○  |     | ●   |   |
| Yes | 4  | ○  | ○  | ●   | -   | ●   | ●   | ○  |     | ●   | ●   |     | ○  |     |     |     |     |     |     |     | ○  |     |     | ●   | ○  |     | ●   |   |
| Yes | 5  | ○  | ○  |     |     | -   |     | ○  |     |     |     | ●   | ○  |     |     |     |     |     |     |     | ○  | ●   |     |     | ●  |     | ●   |   |
| Yes | 6  | ○  | ○  | ●   | ●   |     | -   | ○  |     |     |     |     | ○  |     |     |     |     |     |     |     | ○  |     |     | ●   | ○  |     | ●   |   |
| No  | 7  | ●  | ●  | ○   | ○   | ○   | ○   | -  | ○   | ○   | ●   | ○   |    | ●   | ○   | ○   | ○   | ○   | ○   | ○   |    | ○   | ○   | ○   |    | ○   | ●   |   |
| Yes | 8  | ○  | ○  | ●   |     |     |     | ○  | -   |     |     |     | ○  |     |     |     |     |     |     |     | ○  |     | ●   |     | ○  |     |     |   |
| Yes | 9  | ○  | ○  |     | ●   |     |     | ○  |     | -   |     |     | ○  |     |     |     |     |     |     |     | ○  |     |     |     | ○  |     | ●   |   |
| Yes | 10 | ○  | ○  | ●   | ●   | ●   | ●   | ○  |     | ●   | ●   | ●   | ○  |     |     |     |     |     |     | ●   |    | ○   | ●   |     | ●  |     | ●   |   |
| Yes | 11 | ○  | ○  |     |     | ●   |     | ○  |     |     |     | -   | ○  |     |     | ●   |     |     |     |     | ○  | ●   |     |     | ●  |     | ●   |   |
| No  | 12 | ●  | ●  | ●   | ○   | ●   | ○   |    | ●   | ○   | ○   | ○   | -  | ●   | ○   | ○   | ○   | ○   | ○   | ○   |    | ○   | ○   | ○   |    | ○   | ●   |   |
| Yes | 13 | ○  | ○  |     |     |     |     | ○  |     |     |     |     | ○  | -   |     |     |     |     |     |     | ○  |     |     |     | ○  |     | ●   |   |
| Yes | 14 | ○  | ○  | ●   |     |     |     | ○  |     |     |     |     | ○  |     | -   |     |     |     |     |     | ○  |     |     |     | ○  |     | ●   |   |
| Yes | 15 | ○  | ⊗  | ●   | ●   | ●   | ●   | ○  |     | ●   |     | ●   | ○  |     |     | -   |     |     |     |     | ○  | ●   |     |     | ●  |     | ●   |   |
| Yes | 16 | ○  | ○  | ●   |     | ●   | ●   | ○  |     | ●   | ●   | ●   | ○  |     | ●   | ●   | -   | ●   | ●   |     | ○  | ●   |     | ●   |    | ●   | ●   |   |
| Yes | 17 | ○  | ○  | ●   |     |     |     | ○  |     |     |     |     | ○  |     |     |     |     | -   |     |     | ○  |     |     |     | ○  |     | ●   |   |
| Yes | 18 | ○  | ○  | ●   |     |     | ●   | ○  |     |     | ●   |     | ○  |     |     |     |     |     | -   |     | ○  | ●   |     |     | ○  |     | ●   |   |
| Yes | 19 | ○  | ○  |     |     |     |     | ○  |     |     |     | ●   | ○  |     |     |     |     |     | ●   | -   | ○  |     |     |     | ○  |     | ●   |   |
| No  | 20 |    |    | ●   | ○   | ●   | ●   |    | ○   | ○   | ●   | ○   |    | ○   | ○   | ○   | ○   | ○   | ○   | ○   | -  | ○   | ○   | ○   | ○  | ○   | ○   |   |
| Yes | 21 | ○  | ○  |     |     | ●   | ●   | ○  |     | ●   |     |     | ○  |     |     |     |     |     | ●   |     | ○  | ●   |     |     | ○  |     | ●   |   |
| Yes | 22 | ○  | ○  | ●   |     |     |     | ○  | ●   |     |     |     | ○  |     | ●   |     |     |     |     |     | ○  |     |     |     | ○  |     |     |   |
| Yes | 23 | ●  | ●  | ●   |     |     |     | ○  |     |     | ●   |     | ●  | ●   |     |     |     |     | ●   |     | ○  |     |     | -   | ○  |     | ●   |   |
| No  | 24 |    |    | ○   | ○   | ●   | ●   |    | ○   | ○   | ○   | ○   |    | ○   | ○   | ●   | ○   | ○   | ○   | ○   | ○  | ●   | ●   | ○   | ○  | -   | ○   | ● |
| Yes | 25 | ○  | ●  | ●   |     |     |     | ●  |     |     |     |     | ●  |     |     |     |     |     |     |     | ○  |     | ●   |     | ○  | -   | ●   |   |
| Yes | 26 | ●  | ●  | ●   | ●   | ●   | ●   | ○  | ●   |     |     |     | ○  | ●   |     | ●   |     |     | ●   |     | ○  |     | ●   | ○   |    |     | -   |   |

| High    | Low       | Interactions between HIV and Family Planning Organizations                                                                                                                                                                                                                                                                            |
|---------|-----------|---------------------------------------------------------------------------------------------------------------------------------------------------------------------------------------------------------------------------------------------------------------------------------------------------------------------------------------|
| ●       | ●         | Existing interactions between organizations that offer HIV services and/or FP services<br>High interactions reflect the frequency of clients referrals from one organization to another at least monthly; low interactions reflect a reported frequency of less than once a month.                                                    |
| Primary | Secondary | Opportunities for Integration                                                                                                                                                                                                                                                                                                         |
| ○       | ○         | Opportunity for HIV and FP organizations to refer clients to each other<br>Where "primary" represents an opportunity between an organization that provides HIV services to on that offers FP services<br>Where "secondary" represents an opportunity between an organization that provides FP services to on that offers HIV services |
